# Supplementary material for: Influence of Torrefaction Temperature and Climatic Chamber Operation Time on Hydrophobic Properties of Agri-Food Biomass Investigated Using the EMC Method
Source: MDPI journal article supplement (doi:10.3390/en14175299), 2021-08-26
Supplement: s1 [file s1]

## Article

# Influence of Torrefaction Temperature and Climatic Chamber Operation Time on Hydrophobic Properties of Agri-Food Biomass Investigated Using the EMC Method

Arkadiusz Dyjakon <sup>1,\*</sup>, Tomasz Noszczyk <sup>1</sup>, Łukasz Sobol <sup>1</sup> and Dominika Misiakiewicz <sup>2</sup>
<sup>1</sup> Department of Applied Bioeconomy, Waste Biomass Valorization Group, Wrocław University of Environmental and Life Sciences, 51-630 Wrocław, Poland; arkadiusz.dyjakon@upwr.edu.pl (A.D.); lukasz.sobol@upwr.edu.pl (Ł.S.); tomasz.noszczyk@upwr.edu.pl (T.N.)

<sup>2</sup> Faculty of Life Sciences and Technology, Wrocław University of Environmental and Life Sciences, 51-630 Wrocław, Poland; 110834@student.upwr.edu.pl (D.M.)

\* Correspondence: arkadiusz.dyjakon@upwr.edu.pl; Tel.: +48-71-320-5945

## Supplementary Materials

**Table S1.** Proximate analysis of the investigated raw and torrefied food waste biomass.

| Type of waste biomass | Temperature | Moisture content |      | Ash content |      | Volatile matter content |      | Fixed Carbon content |      | Higher Heating Value |      |
|-----------------------|-------------|------------------|------|-------------|------|-------------------------|------|----------------------|------|----------------------|------|
|                       |             | Mean             | SD   | Mean        | SD   | Mean                    | SD   | Mean                 | SD   | Mean                 | SD   |
|                       | °C          | %                |      |             |      |                         |      | MJ·kg <sup>-1</sup>  |      |                      |      |
| Mandarin peels        | 105         | 4.57             | 0.25 | 3.52        | 0.06 | 82.16                   | 0.61 | 9.75                 | 0.80 | 16.96                | 0.27 |
|                       | 200         | 1.80             | 0.33 | 3.91        | 0.11 | 75.08                   | 0.54 | 19.21                | 0.62 | 19.30                | 0.14 |
|                       | 220         | 2.21             | 0.23 | 4.26        | 0.10 | 72.64                   | 0.52 | 20.88                | 0.81 | 19.69                | 0.13 |
|                       | 240         | 2.74             | 0.09 | 6.22        | 0.44 | 50.10                   | 0.66 | 40.94                | 0.93 | 23.31                | 0.10 |
|                       | 260         | 2.10             | 0.38 | 6.10        | 0.17 | 52.61                   | 0.08 | 39.19                | 0.60 | 23.09                | 0.02 |
|                       | 280         | 2.92             | 0.10 | 6.87        | 0.27 | 53.16                   | 1.48 | 37.04                | 1.14 | 24.65                | 0.09 |
|                       | 300         | 2.43             | 0.07 | 8.35        | 0.30 | 39.56                   | 1.87 | 49.66                | 1.84 | 26.66                | 0.05 |
|                       | 320         | 2.68             | 0.17 | 8.61        | 0.31 | 37.19                   | 2.20 | 51.52                | 2.60 | 26.69                | 0.13 |
| Lemon peels           | 105         | 4.22             | 0.02 | 4.94        | 0.09 | 80.77                   | 0.42 | 10.08                | 0.37 | 16.82                | 0.05 |
|                       | 200         | 2.54             | 0.32 | 5.33        | 0.04 | 78.86                   | 2.33 | 13.27                | 2.03 | 17.35                | 0.11 |
|                       | 220         | 2.22             | 0.18 | 5.98        | 0.02 | 71.72                   | 0.21 | 20.08                | 1.42 | 18.37                | 0.11 |
|                       | 240         | 3.16             | 0.10 | 6.22        | 0.21 | 61.95                   | 4.95 | 28.67                | 2.02 | 18.57                | 0.23 |
|                       | 260         | 3.82             | 0.10 | 7.75        | 0.10 | 57.98                   | 0.32 | 30.46                | 1.55 | 21.30                | 0.17 |
|                       | 280         | 4.32             | 0.14 | 9.38        | 0.35 | 48.46                   | 0.11 | 37.84                | 0.72 | 22.18                | 0.33 |
|                       | 300         | 4.90             | 0.04 | 9.72        | 0.21 | 44.95                   | 0.28 | 40.44                | 0.99 | 23.53                | 0.14 |
|                       | 320         | 3.65             | 0.09 | 12.34       | 0.41 | 32.93                   | 0.77 | 51.08                | 2.19 | 26.07                | 0.30 |
| Grapefruit peels      | 105         | 5.80             | 0.27 | 4.08        | 0.05 | 84.46                   | 0.33 | 5.66                 | 0.57 | 15.74                | 0.15 |
|                       | 200         | 2.82             | 0.02 | 4.77        | 0.09 | 77.75                   | 0.46 | 14.66                | 0.55 | 19.38                | 1.01 |
|                       | 220         | 3.14             | 0.12 | 5.60        | 0.17 | 68.80                   | 0.73 | 22.45                | 0.71 | 20.65                | 0.14 |
|                       | 240         | 2.69             | 0.14 | 6.74        | 0.19 | 66.23                   | 0.04 | 24.34                | 0.28 | 21.52                | 0.17 |
|                       | 260         | 3.56             | 0.16 | 9.73        | 0.06 | 47.52                   | 0.61 | 39.19                | 0.73 | 24.15                | 0.26 |
|                       | 280         | 3.12             | 0.02 | 9.67        | 0.32 | 48.49                   | 0.21 | 38.72                | 0.23 | 24.26                | 0.20 |
|                       | 300         | 3.54             | 0.27 | 10.08       | 0.65 | 47.55                   | 0.79 | 38.83                | 0.78 | 24.36                | 0.17 |
|                       | 320         | 3.61             | 0.13 | 10.51       | 0.18 | 44.21                   | 0.29 | 41.67                | 0.13 | 25.11                | 0.02 |

---

|                     |     |      |      |       |      |       |      |       |      |       |      |
|---------------------|-----|------|------|-------|------|-------|------|-------|------|-------|------|
| Butternut<br>squash | 105 | 3.07 | 0.17 | 8.74  | 0.21 | 78.22 | 1.93 | 9.97  | 1.58 | 16.72 | 0.28 |
|                     | 200 | 0.67 | 0.08 | 9.30  | 0.08 | 71.88 | 0.11 | 18.36 | 0.40 | 16.97 | 0.25 |
|                     | 220 | 2.35 | 0.01 | 9.84  | 0.16 | 70.49 | 0.27 | 18.10 | 1.42 | 18.56 | 0.09 |
|                     | 240 | 2.94 | 0.07 | 13.95 | 0.10 | 54.41 | 1.10 | 29.67 | 2.02 | 19.95 | 0.05 |
|                     | 260 | 2.08 | 0.49 | 16.60 | 0.40 | 43.88 | 0.86 | 38.14 | 1.55 | 23.93 | 0.13 |
|                     | 280 | 2.61 | 0.23 | 17.94 | 0.29 | 41.18 | 0.42 | 38.27 | 0.72 | 24.38 | 0.06 |
|                     | 300 | 2.78 | 0.06 | 18.64 | 0.55 | 37.87 | 0.29 | 41.63 | 0.99 | 25.07 | 0.11 |
|                     | 320 | 2.39 | 0.06 | 19.65 | 0.11 | 36.09 | 1.45 | 42.67 | 2.19 | 25.08 | 0.12 |

---
